# Supplementary material
Source: HighWire-hosted journal article supplement (https://bmjopen.bmj.com/content/6/3/e010409)
Supplement: inline-supplementary-material-1 [file inline-supplementary-material-1.pdf]

# Appendix 1

## MEDLINE (via Pubmed) search strategy

1. (health administrative) OR (administrative data) OR (administrative database) OR (claim administrative) OR (International Classification of Diseases) "International Classification of Diseases"[Mesh] OR ICD-9-CM OR ICD-10 OR "Database Management Systems"[Mesh] OR "Medical Records Systems, Computerized"[ Mesh] OR "CPT" OR "Current procedural terminology"[ Mesh]
2. (factual databases) OR (geographic information systems) OR (national practitioner data bank) OR (insurance database)
3. #1 OR#2
4. sensitivity or "Sensitivity and Specificity"[Mesh]
5. specificity[Title/Abstract]
6. (positive predictive value) OR (negative predictive value) OR (likelihood ratio) OR (receiver operating characteristic) OR kappa
7. ((case or cases) AND (verificat\* OR valid\* OR identif\* OR definition\* OR define\* OR evaluat\*))
8. Algorithm OR " Algorithm"[Mesh]
9. #4 OR #5 OR#6 OR #7 OR #8
10. (breast cancer) OR ("Breast Neoplasms"[Mesh]) OR (breast neoplasm\*) OR (breast tumour\*) OR (breast tumor\*) OR (breast malign\*)
11. (lung cancer) OR ("lung Neoplasms"[Mesh]) OR (lung neoplasm\*) OR (lung tumour\*) OR (lung tumor\*) OR (lung malign\*)
12. (colo\* cancer) OR ("Colorectal Neoplasms"[Mesh]) OR (colo\* neoplasm\*) OR (colo\* tumour\*) OR (colo\* tumor\*) OR (colo\* malign\*)
13. #10 OR #11 OR #12
14. # 3 AND #9 AND #13

## EMBASE search strategy (via embase.com)

1. health NEAR/3 (administrative) OR administrative NEAR/3 data OR administrative NEAR/3 database OR claim NEAR/3 administrative OR (International Classification of Diseases) OR 'International Classification of Diseases'/exp OR ICD-9-CM OR ICD-10 OR 'Database Management Systems'/exp OR 'Medical Records Systems, Computerized'/exp OR "CPT" OR 'Current procedural terminology'/exp
2. database:ab,ti OR ('practitioner'/exp OR practitioner AND data AND bank) OR ('practitioner'/exp OR practitioner AND ('database'/exp OR database)) OR ('insurance' AND ('database'/exp OR database))
3. #1 OR #2
4. 'sensitivity and specificity'/exp OR 'sensitivity and specificity'
5. specificity:ab,ti
6. 'predictive value of tests'/exp OR 'predictive value of tests'
7. positive:ab,ti AND predictive:ab,ti AND value:ab,ti OR (negative:ab,ti AND predictive:ab,ti AND value:ab,ti) OR (likelihood:ab,ti AND ratio:ab,ti) OR (receiver:ab,ti AND operating:ab,ti AND characteristic:ab,ti) OR kappa:ab,ti
8. case NEAR/1 (verificat\* OR valid\* OR identif\* OR definition\* OR define\* OR evaluat\*)
9. 'algorithms'/exp OR algorithm
10. #4 OR #5 OR #6 OR #7 OR #8 OR #9
11. 'breast'/exp OR 'breast neoplasm'/exp OR 'breast tumor'/exp OR (breast\* NEAR/3 neoplas\*):ab,ti OR (breast\* NEAR/3 cancer\*):ab,ti OR (breast\* NEAR/3 carcin\*):ab,ti OR (breast\* NEAR/3 tumo\*):ab,ti OR (breast\* NEAR/3 metasta\*):ab,ti OR (breast\* NEAR/3 malig\*):ab,ti
12. ('lung'/exp OR 'lung neoplasm'/exp OR 'lung tumor'/exp OR (lung\* NEAR/3 neoplas\*):ab,ti OR (lung\* NEAR/3 cancer\*):ab,ti OR (lung\* NEAR/3 carcin\*):ab,ti OR (lung\* NEAR/3 tumo\*):ab,ti OR (lung\* NEAR/3 metasta\*):ab,ti OR (lung\* NEAR/3 malig\*):ab,ti
13. ('colo\*'/exp OR 'colo\* neoplasm'/exp OR 'colo\* tumor'/exp OR (colo\*\* NEAR/3 neoplas\*):ab,ti OR (colo\*\* NEAR/3 cancer\*):ab,ti OR (colo\*\* NEAR/3 carcin\*):ab,ti OR (colo\*\* NEAR/3 tumo\*):ab,ti OR (colo\*\* NEAR/3 metasta\*):ab,ti OR (colo\*\* NEAR/3 malig\*):ab,ti
14. #11 OR #12 OR #13
15. #3 AND #10 AND 14

## Web of Science search strategy

1. (health NEAR/3 administrative) OR (administrative NEAR/3 data) OR (administrative NEAR/3 database) OR (claim NEAR/3 administrative) OR (International Classification of Diseases) OR ICD-9-CM OR ICD-10 OR (Database Management Systems) OR (Medical Records Systems NEAR/2 Computerized) OR "CPT" OR (Current procedural terminology)
2. (factual databases) OR (geographic information systems) OR (national practitioner data bank) OR (insurance database)
3. #1 OR#2
4. sensitivity or "Sensitivity and Specificity"
5. specificity
6. (positive predictive value) OR (negative predictive value) OR (likelihood ratio) OR (receiver operating characteristic) OR kappa
7. ((case or cases) AND (verificat\* OR valid\* OR identif\* OR definition\* OR define\* OR evaluat\*))
8. algorithm
9. #4 OR #5 OR#6 OR #7
10. (breast NEAR/3 cancer) OR (breast NEAR/3 neoplasm\*) OR (breast NEAR/3 tumour\*) OR (breast NEAR/3 tumor\*) OR (breast NEAR/3 malig\*)
11. (lung NEAR/3 cancer) OR ("lung Neoplasms"[Mesh]) OR (lung NEAR/3 neoplasm\*) OR (lung NEAR/3 tumour\*) OR (lung NEAR/3 tumor\*) OR (lung NEAR/3 malig\*)
12. (colo\* NEAR/3 cancer) OR (colo\* NEAR/3 neoplasm\*) OR (colo\* NEAR/3 tumour\*) OR (colo\* NEAR/3 tumor\*) OR (colo\* NEAR/3 malig\*)
13. #10 OR #11 OR #12
14. # 3 AND #9 AND #13

## The Cochrane Library

1. (health near/3 administrative) OR (administrative near/3 data) OR (administrative near/3 database) OR (claim near/3 administrative) OR (International Classification of Diseases) "International Classification of Diseases"[Mesh] OR ICD-9-CM OR ICD-10 OR "Database Management Systems"[Mesh] OR "Medical Records Systems, Computerized"[ Mesh] OR "CPT" OR "Current procedural terminology"[ Mesh]
2. (factual databases) OR (geographic information systems) OR (national practitioner data bank) OR (insurance database)
3. #1 OR #2
4. sensitivity or "Sensitivity and Specificity"[Mesh]
5. specificity[Title/Abstract]
6. (positive predictive value) OR (negative predictive value) OR (likelihood ratio) OR (receiver operating characteristic) OR kappa
7. ((case or cases) AND (verificat\* OR valid\* OR identif\* OR definition\* OR define\* OR evaluat\*))
8. Algorithm OR " Algorithm"[Mesh]
9. #4 OR #5 OR#6 OR #7 OR #8
10. ("Breast Neoplasms"[Mesh]) OR (breast near/3 cancer) or (breast near/3 neoplasm\*) or (breast near/3 tumour\*) or (breast near/3 tumor\*) or (breast near/3 malign\*)
11. ("Lung Neoplasms"[Mesh]) OR (lung near/3 cancer) or (lung near/3 neoplasm\*) or (lung near/3 tumour\*) or (lung near/3 tumor\*) or (lung near/3 malign\*)
12. ("Colorectal Neoplasms"[Mesh]) OR (colo\* Near/3 cancer) OR (colo\* Near/3 neoplasm\*) OR (colo\* Near/3 tumour\*) OR (colo\* Near/3 tumor\*) OR (colo\* Near/3 malign\*)
13. #10 OR #11 OR #12
14. # 3 AND #9 AND #13

## Appendix 2

Checklist of reporting criteria for studies validating health administrative data algorithms (developed by Benchimol et al., based on the criteria published by the Standards for Reporting of Diagnostic accuracy (STARD) initiative for the accurate reporting of studies using diagnostic studies.

|                                                                                                                                                                                                                      | YES | NO | UNCERTAIN | NOT APPLICABLE |
|----------------------------------------------------------------------------------------------------------------------------------------------------------------------------------------------------------------------|-----|----|-----------|----------------|
| <b>TITLE, KEYWORDS, ABSTRACT</b>                                                                                                                                                                                     |     |    |           |                |
| Identify article as study of assessing diagnostic accuracy                                                                                                                                                           |     |    |           |                |
| Identify article as study of administrative data                                                                                                                                                                     |     |    |           |                |
| <b>INTRODUCTION:</b>                                                                                                                                                                                                 |     |    |           |                |
| State disease identification & validation one of goals of study                                                                                                                                                      |     |    |           |                |
| <b>METHODS:</b>                                                                                                                                                                                                      |     |    |           |                |
| <i>Participants in validation cohort:</i>                                                                                                                                                                            |     |    |           |                |
| Describe validation cohort (Cohort of patients to which reference standard was applied)                                                                                                                              |     |    |           |                |
| <ul style="list-style-type: none"> <li>Age</li> </ul>                                                                                                                                                                |     |    |           |                |
| <ul style="list-style-type: none"> <li>Disease</li> </ul>                                                                                                                                                            |     |    |           |                |
| <ul style="list-style-type: none"> <li>Severity</li> </ul>                                                                                                                                                           |     |    |           |                |
| <ul style="list-style-type: none"> <li>Location/Jurisdiction</li> </ul>                                                                                                                                              |     |    |           |                |
| Describe recruitment procedure of validation cohort                                                                                                                                                                  |     |    |           |                |
| <ul style="list-style-type: none"> <li>Inclusion criteria</li> </ul>                                                                                                                                                 |     |    |           |                |
| <ul style="list-style-type: none"> <li>Exclusion criteria</li> </ul>                                                                                                                                                 |     |    |           |                |
| Describe patient sampling (random, consecutive, all, etc.)                                                                                                                                                           |     |    |           |                |
| Describe data collection                                                                                                                                                                                             |     |    |           |                |
| <ul style="list-style-type: none"> <li>Who identified patients and did selection adhere to patient recruitment criteria</li> </ul>                                                                                   |     |    |           |                |
| <ul style="list-style-type: none"> <li>Who collected data</li> </ul>                                                                                                                                                 |     |    |           |                |
| <ul style="list-style-type: none"> <li><i>A priori</i> data collection form</li> </ul>                                                                                                                               |     |    |           |                |
| <ul style="list-style-type: none"> <li>Disease classification</li> </ul>                                                                                                                                             |     |    |           |                |
| <ul style="list-style-type: none"> <li>Split sample (i.e. re-validation using a separate cohort)               <ul style="list-style-type: none"> <li>a) Training set</li> <li>b) Testing set</li> </ul> </li> </ul> |     |    |           |                |
| <i>Test Methods:</i>                                                                                                                                                                                                 |     |    |           |                |
| Describe number, training and expertise of persons reading reference standard                                                                                                                                        |     |    |           |                |
| If >1 person reading reference standard, quote measure of consistency (e.g. kappa)                                                                                                                                   |     |    |           |                |

|                                                                                                                                                                 |  |  |  |  |
|-----------------------------------------------------------------------------------------------------------------------------------------------------------------|--|--|--|--|
| Blinding of interpreters of reference standard to results of classification by administrative data<br>e.g. Chart abstractor blinded to how that chart was coded |  |  |  |  |
| <i>Statistical Methods:</i>                                                                                                                                     |  |  |  |  |
| Describe methods of calculating/comparing diagnostic accuracy                                                                                                   |  |  |  |  |
| <b>RESULTS:</b>                                                                                                                                                 |  |  |  |  |
| <i>Participants:</i>                                                                                                                                            |  |  |  |  |
| Report when study done, start/end dates of enrollment                                                                                                           |  |  |  |  |
| Describe number of people who satisfied inclusion/exclusion criteria                                                                                            |  |  |  |  |
| Study flow diagram                                                                                                                                              |  |  |  |  |
| <i>Test results:</i>                                                                                                                                            |  |  |  |  |
| Report distribution of disease severity                                                                                                                         |  |  |  |  |
| Report cross-tabulation of index tests by results of reference standard                                                                                         |  |  |  |  |
| <i>Estimates:</i>                                                                                                                                               |  |  |  |  |
| Report at least 4 estimates of diagnostic accuracy                                                                                                              |  |  |  |  |
| Diagnostic Accuracy Measures Reported:                                                                                                                          |  |  |  |  |
| • Sensitivity                                                                                                                                                   |  |  |  |  |
| • Spec                                                                                                                                                          |  |  |  |  |
| • PPV                                                                                                                                                           |  |  |  |  |
| • NPV                                                                                                                                                           |  |  |  |  |
| • Likelihood ratios                                                                                                                                             |  |  |  |  |
| • Kappa                                                                                                                                                         |  |  |  |  |
| • Area under the ROC curve / c-statistic                                                                                                                        |  |  |  |  |
| • Accuracy/agreement                                                                                                                                            |  |  |  |  |
| • Other (specify)                                                                                                                                               |  |  |  |  |
| Report accuracy for subgroups (e.g. age, geography, different sex, etc.)                                                                                        |  |  |  |  |
| If PPV/NPV reported, ratio of cases/controls of validation cohort approximate prevalence of condition in the population                                         |  |  |  |  |
| Report 95% confidence intervals for each diagnostic measure                                                                                                     |  |  |  |  |
| <b>DISCUSSION:</b>                                                                                                                                              |  |  |  |  |
| Discuss the applicability of the validation findings                                                                                                            |  |  |  |  |
